# Supplementary material
Source: Royal Society of Chemistry journal article supplement (doi:10.1039/d5gc06059a)
Supplement: d5gc06059a1.pdf [file d5gc06059a1.pdf]

## *Supporting Information for*

### Solvent-Mediated Contaminant Removal from Plastic Waste Using Thermodynamic Modeling

*Panzheng Zhou<sup>1,#</sup>, Ugochukwu M. Ikegwu<sup>1,#</sup>, Elizaveta Radkevich<sup>1</sup>, Euncheol Ra<sup>1</sup>, Hadeia Liburd<sup>2</sup>,*

*George W. Huber<sup>1</sup>, Victor M. Zavala<sup>1</sup>, and Reid C. Van Lehn<sup>1,3,\*</sup>*

<sup>1</sup>Department of Chemical and Biological Engineering, University of Wisconsin – Madison, Madison, WI, 53706, United States.

<sup>2</sup>Department of Chemical Engineering, Howard University, Washington, DC, 20059, United States.

<sup>3</sup>Department of Chemistry, University of Wisconsin – Madison, Madison, WI, 53706, United States.

\*send correspondence to: [vanlehn@wisc.edu](mailto:vanlehn@wisc.edu)

#These authors contributed equally.

## Polymer and Solvent Modeling

In previous work,<sup>1, 2</sup> we developed a computational approach to compute temperature-dependent polymer solubilities that comprises three main steps: (1) performing molecular dynamics (MD) simulations of representative oligomers of each polymer in dilute solution to sample a wide range of chain conformations, (2) selecting a representative subset of conformations and computing screening charge densities using density functional theory (DFT) calculations, and (3) using average  $\sigma$ -profiles from these calculations with a reference experimentally determined solubility for the desired polymer to perform solubility calculations using COSMO-RS. The polymer  $\sigma$ -profiles obtained using this approach were also used in this study to compute contaminant  $\log P$  values; here, we provide details on this previous methodology.

Polymers were modeled as oligomers and simulated in dilute solution. All-atom MD simulations were performed in the isothermal–isobaric (*NPT*) ensemble using GROMACS 2016. Solvents were selected based on literature reports of good solvents for each polymer: PE, PP, and PS were simulated in toluene, whereas PVC and PET were simulated in dichloromethane. All molecules were modeled using the Generalized AMBER Force Field (GAFF). Systems were initialized in cubic simulation boxes containing a single polymer chain, solvated, energy minimized, and equilibrated for 2 ns in the *NPT* ensemble at 300 K and 1 bar. Production simulations of 10 ns were subsequently performed under *NPT* conditions. Representative oligomer conformations (hereafter referred to as conformers) were extracted from the production trajectories based on two structural descriptors: the radius of gyration ( $R_g$ ) and the solvent-accessible surface area (SASA). To ensure broad conformational coverage, a two-dimensional  $R_g$ –SASA scatter plot was partitioned using a square grid, and conformers closest to grid intersection points were selected. The selected conformers were used as initial configurations for DFT calculations to generate COSMO files containing screening charge densities. For these calculations, geometry optimization was performed using the conductor-like polarizable continuum model (CPCM), followed by single-point calculations in the infinite dielectric constant limit. All DFT calculations were carried out using Gaussian 16 at the BVP86/TZVP/DGA1 level of theory. Precomputed COSMO files for solvents were obtained from the COSMObase-1901-BP-TZVP database. Oligomer COSMO files were used as input for COSMO-RS solubility calculations by averaging  $\sigma$ -profiles for all oligomer conformers, with terminal groups deactivated to approximate polymer behavior, to represent the corresponding polymer. These profiles were used to compute polymer chemical potentials and predict solubility via a solid–liquid equilibrium calculation requiring the polymer melting temperature and an experimentally measured reference solubility. The same average  $\sigma$ -profiles were used to represent the polymer phase for the  $\log P$  calculations performed in the main text using COSMOtherm 19 with the BP\_TZVP\_19 parameterization. Complete details on this methodology are included in our prior work.<sup>1, 2</sup>

## Summary of Experimental Methods for Brominated Flame Retardant (BFR) Extraction

For the BFR removal case study (Case Study 1) reported in the main text, molecular modeling predictions were validated against experimentally reported data from two prior studies that investigated the solvent-based extraction of polybrominated diphenyl ethers (PBDEs)<sup>3</sup> and other selected BFRs (hexabromocyclododecane, decabromodiphenylether, and TBBPA-bis-2,3-dibromopropylether).<sup>4</sup> Here, we briefly summarize the experimental methods used in these studies.

In the first study by Singla et al, standard solution mixtures containing 2,4,4'-tribromodiphenyl ether (tri-PBDE) at varying concentrations were prepared. Four types of plastics (PET, LDPE, PP, and PS) were used. These materials were originally sourced from food-contact products (*e.g.*, water bottles and straws) and mechanically reduced to particle sizes ranging from 4 to 700  $\mu\text{m}$ ; particles of approximately 500  $\mu\text{m}$  were used for the extraction experiments. A known mass of plastic was submerged in the prepared tri-PBDE solution, heated to 40°C under agitation for 2 hours, and subsequently allowed to stand at room temperature for 24 hours. The solution was then filtered, and the recovered plastics containing sorbed tri-PBDE were dried at room temperature. For the extraction step, the contaminated microplastics were immersed in various organic solvents and left undisturbed for 48 hours. The organic phase was then analyzed to determine extraction efficiencies for the different solvents. We refer to the cited literature for a more detailed description of the experimental and analytical techniques.<sup>3</sup>

In the second study by Altwaiq et al, PS was obtained from discarded television and personal computer housings and ground to an average particle size of approximately 1000  $\mu\text{m}$ . For solvent-based BFR removal, 0.2g of the polymer material was added to 20 mL of the selected solvent and stirred 60 °C for 2 hours. After cooling to room temperature, the mixture was filtered, and the solvent phase was analyzed to quantify bromine concentration as a measure of BFR extraction efficiency. We refer to the cited literature for a more detailed description of the experimental and analytical techniques.<sup>4</sup>

**Table S1.** Summary of log  $P$  values for all four BFRs studied in this work, their miscibility, and PS polymer solubilities in 32 common solvents. The log  $P$  and BFR miscibility calculations are performed at room temperature (25°C) with PS as the polymer phase. The remark column of “yes” indicates that the solvent satisfies all leaching criteria and “no” if it does not satisfy all criteria. For this analysis, a maximum RT solubility of 6 wt% is used as part of the leaching criteria to reflect the maximum predicted solubility value that was associated with high experimental extraction efficiency in Table 1 of the main text; this threshold is higher than the threshold for precipitation during STRAP to account for the preference for slight swelling during leaching without excessive polymer dissolution.

| Solvents              | Th (°C) | log $P$ values in each solvent at (RT) |      |       |           | Miscibility in each solvent at (RT) |      |      |           | Polymer Solubility (%) |         | Remark |
|-----------------------|---------|----------------------------------------|------|-------|-----------|-------------------------------------|------|------|-----------|------------------------|---------|--------|
|                       |         | Tri-PBDE                               | HBCD | DECA  | TBBPA-dbp | Tri-PBDE                            | HBCD | DECA | TBBPA-dbp | RT (°C)                | Th (°C) |        |
| methanol              | 63.6    | -0.1                                   | 1.0  | -1.5  | 0.3       | Yes                                 | Yes  | No   | Yes       | 0.0                    | 0.0     | No     |
| dichloromethane       | 39.0    | 0.9                                    | 1.7  | 1.0   | 2.1       | Yes                                 | Yes  | Yes  | Yes       | 4.6                    | 8.5     | Yes    |
| ethylene glycol       | 120.0   | -1.2                                   | -0.2 | -3.5  | -1.6      | No                                  | Yes  | No   | No        | 0.0                    | 0.0     | No     |
| Acetone               | 55.0    | 1.5                                    | 3.1  | 0.5   | 3.7       | Yes                                 | Yes  | Yes  | Yes       | 9.2                    | 21.3    | No     |
| Isopropanol           | 81.3    | -0.3                                   | 0.3  | -1.6  | -0.3      | Yes                                 | Yes  | No   | Yes       | 0.0                    | 1.2     | No     |
| 1-propanol            | 96.2    | -0.3                                   | 0.3  | -1.6  | -0.4      | Yes                                 | Yes  | No   | Yes       | 0.0                    | 2.8     | No     |
| toluene               | 109.6   | 0.8                                    | 0.9  | 1.1   | 1.2       | Yes                                 | Yes  | Yes  | Yes       | 3.6                    | 41.0    | Yes    |
| chloroform            | 60.1    | 0.8                                    | 1.2  | 1.1   | 1.6       | Yes                                 | Yes  | Yes  | Yes       | 2.3                    | 9.8     | Yes    |
| tetrahydrofuran       | 64.0    | 1.4                                    | 2.7  | 0.2   | 3.2       | Yes                                 | Yes  | Yes  | Yes       | 14.0                   | 31.3    | No     |
| tetrahydropyran       | 87.0    | 1.0                                    | 1.9  | -0.2  | 2.1       | Yes                                 | Yes  | Yes  | Yes       | 7.2                    | 33.7    | No     |
| cyclohexane           | 79.7    | -0.6                                   | -1.3 | -1.3  | -2.2      | Yes                                 | No   | No   | No        | 0.2                    | 4.6     | No     |
| heptane               | 97.5    | -0.8                                   | -1.5 | -1.5  | -2.4      | Yes                                 | No   | No   | No        | 0.1                    | 5.2     | No     |
| triethylamine         | 88.0    | 0.5                                    | 1.7  | -0.8  | 1.6       | Yes                                 | Yes  | No   | Yes       | 0.8                    | 12.9    | No     |
| 1,2-propanediol       | 120.0   | -0.9                                   | -0.1 | -2.9  | -1.2      | No                                  | Yes  | No   | No        | 0.0                    | 0.3     | No     |
| dimethyl sulfoxide    | 120.0   | 1.7                                    | 3.8  | 0.1   | 4.4       | Yes                                 | Yes  | Yes  | Yes       | 1.5                    | 18.2    | Yes    |
| hexane                | 67.7    | -0.7                                   | -1.4 | -1.3  | -2.3      | Yes                                 | No   | No   | No        | 0.1                    | 1.9     | No     |
| acetylacetone         | 120.0   | 0.9                                    | 2.3  | -0.4  | 2.5       | Yes                                 | Yes  | Yes  | Yes       | 0.5                    | 23.0    | No     |
| tert-butanol          | 81.4    | -0.3                                   | 0.1  | -1.7  | -0.5      | Yes                                 | Yes  | No   | Yes       | 0.0                    | 2.0     | No     |
| ethyl acetate         | 76.1    | 1.2                                    | 2.4  | 0.2   | 2.8       | Yes                                 | Yes  | Yes  | Yes       | 5.4                    | 24.9    | Yes    |
| isopropylamine        | 30.7    | 0.8                                    | 2.1  | -0.8  | 2.3       | Yes                                 | Yes  | No   | Yes       | 1.8                    | 2.7     | No     |
| diphenyl ether        | 120.0   | 0.7                                    | 0.9  | 1.0   | 1.2       | Yes                                 | Yes  | Yes  | Yes       | 0.8                    | 25.3    | Yes    |
| dodecane              | 120.0   | -1.1                                   | -1.9 | -2.0  | -3.0      | No                                  | No   | No   | No        | 0.0                    | 4.1     | No     |
| N,N-dimethylformamide | 120.0   | 1.9                                    | 3.8  | 0.6   | 4.6       | Yes                                 | Yes  | Yes  | Yes       | 7.4                    | 47.9    | No     |
| 2,3-dihydropyran      | 85.0    | 0.8                                    | 1.3  | 0.3   | 1.6       | Yes                                 | Yes  | Yes  | Yes       | 5.1                    | 31.2    | Yes    |
| methylacetate         | 55.8    | 1.3                                    | 2.7  | 0.4   | 3.2       | Yes                                 | Yes  | Yes  | Yes       | 4.9                    | 14.9    | Yes    |
| ethanol               | 77.2    | -0.1                                   | 0.7  | -1.4  | 0.2       | Yes                                 | Yes  | No   | Yes       | 0.0                    | 0.7     | No     |
| cyclohexanol          | 120.0   | -0.5                                   | -0.3 | -2.1  | -1.1      | Yes                                 | Yes  | No   | No        | 0.0                    | 8.4     | No     |
| 2-butanone            | 78.5    | 1.2                                    | 2.5  | 0.1   | 2.9       | Yes                                 | Yes  | Yes  | Yes       | 6.9                    | 30.9    | No     |
| water                 | 99.0    | -6.2                                   | -5.3 | -10.5 | -10.3     | No                                  | No   | No   | No        | 0.0                    | 0.0     | No     |
| benzene               | 79.0    | 1.0                                    | 1.3  | 1.5   | 1.8       | Yes                                 | Yes  | Yes  | Yes       | 5.3                    | 29.3    | Yes    |
| acetic acid           | 116.9   | -0.1                                   | 1.1  | -1.5  | 0.6       | Yes                                 | Yes  | No   | Yes       | 0.0                    | 0.6     | No     |
| o-xylene              | 120.0   | 0.6                                    | 0.6  | 0.8   | 0.8       | Yes                                 | Yes  | Yes  | Yes       | 2.4                    | 41.5    | Yes    |

**Table S2.** Summary of  $\log P$  for all four BFRs studied in this work, their miscibility, and PET polymer solubilities in 32 common solvents. The  $\log P$  and BFR miscibility calculations are performed at room temperature (25°C) with PET as the polymer phase. The remark column of “yes” indicates that the solvent satisfies all leaching criteria and “no” if it does not satisfy all criteria. For this analysis, a maximum RT solubility of 6 wt% is used as part of the leaching criteria to reflect the maximum predicted solubility value that was associated with high experimental extraction efficiency in Table 1 of the main text; this threshold is higher than the threshold for precipitation during STRAP to account for the preference for slight swelling during leaching without excessive polymer dissolution.

| Solvents              | Th (°C) | log $P$ values in each solvent at (RT) |      |       |           | Miscibility in each solvent at (RT) |      |      |           | Polymer Solubility (%) |         | Remark |
|-----------------------|---------|----------------------------------------|------|-------|-----------|-------------------------------------|------|------|-----------|------------------------|---------|--------|
|                       |         | Tri-PBDE                               | HBCD | DECA  | TBBPA-dbp | Tri-PBDE                            | HBCD | DECA | TBBPA-dbp | RT (°C)                | Th (°C) |        |
| methanol              | 63.6    | -0.6                                   | -0.1 | -1.6  | -1.1      | Yes                                 | Yes  | No   | Yes       | 0.0                    | 0.0     | No     |
| dichloromethane       | 39.0    | 0.5                                    | 0.5  | 0.9   | 0.7       | Yes                                 | Yes  | Yes  | Yes       | 0.3                    | 0.8     | Yes    |
| ethylene glycol       | 120.0   | -1.6                                   | -1.3 | -3.6  | -3.0      | No                                  | Yes  | No   | No        | 0.0                    | 0.0     | No     |
| Acetone               | 55.0    | 1.1                                    | 2.0  | 0.4   | 2.3       | Yes                                 | Yes  | Yes  | Yes       | 0.1                    | 0.7     | Yes    |
| Isopropanol           | 81.3    | -0.7                                   | -0.8 | -1.7  | -1.7      | Yes                                 | Yes  | No   | Yes       | 0.0                    | 0.0     | No     |
| 1-propanol            | 96.2    | -0.7                                   | -0.9 | -1.7  | -1.8      | Yes                                 | Yes  | No   | Yes       | 0.0                    | 0.1     | No     |
| toluene               | 109.6   | 0.3                                    | -0.3 | 1.0   | -0.2      | Yes                                 | Yes  | Yes  | Yes       | 0.0                    | 2.5     | No     |
| chloroform            | 60.1    | 0.3                                    | 0.0  | 1.0   | 0.2       | Yes                                 | Yes  | Yes  | Yes       | 0.2                    | 1.0     | No     |
| tetrahydrofuran       | 64.0    | 1.0                                    | 1.5  | 0.1   | 1.8       | Yes                                 | Yes  | Yes  | Yes       | 0.0                    | 0.8     | Yes    |
| tetrahydropyran       | 87.0    | 0.5                                    | 0.8  | -0.3  | 0.7       | Yes                                 | Yes  | Yes  | Yes       | 0.0                    | 0.8     | No     |
| cyclohexane           | 79.7    | -1.0                                   | -2.5 | -1.4  | -3.6      | Yes                                 | No   | No   | No        | 0.0                    | 0.0     | No     |
| heptane               | 97.5    | -1.2                                   | -2.7 | -1.6  | -3.8      | Yes                                 | No   | No   | No        | 0.0                    | 0.0     | No     |
| triethylamine         | 88.0    | 0.1                                    | 0.6  | -0.9  | 0.2       | Yes                                 | Yes  | No   | Yes       | 0.0                    | 0.0     | No     |
| 1,2-propanediol       | 120.0   | -1.3                                   | -1.2 | -3.0  | -2.6      | No                                  | Yes  | No   | No        | 0.0                    | 0.0     | No     |
| dimethyl sulfoxide    | 120.0   | 1.3                                    | 2.6  | 0.0   | 3.0       | Yes                                 | Yes  | Yes  | Yes       | 0.0                    | 8.3     | No     |
| hexane                | 67.7    | -1.1                                   | -2.6 | -1.4  | -3.6      | Yes                                 | No   | No   | No        | 0.0                    | 0.0     | No     |
| acetylacetone         | 120.0   | 0.4                                    | 1.1  | -0.5  | 1.1       | Yes                                 | Yes  | Yes  | Yes       | 0.0                    | 2.0     | No     |
| tert-butanol          | 81.4    | -0.7                                   | -1.0 | -1.8  | -1.9      | Yes                                 | Yes  | No   | Yes       | 0.0                    | 0.0     | No     |
| ethyl acetate         | 76.1    | 0.8                                    | 1.3  | 0.1   | 1.4       | Yes                                 | Yes  | Yes  | Yes       | 0.0                    | 0.5     | Yes    |
| isopropylamine        | 30.7    | 0.4                                    | 1.0  | -0.9  | 0.9       | Yes                                 | Yes  | No   | Yes       | 0.0                    | 0.0     | No     |
| diphenyl ether        | 120.0   | 0.3                                    | -0.2 | 0.9   | -0.2      | Yes                                 | Yes  | Yes  | Yes       | 0.0                    | 1.4     | No     |
| dodecane              | 120.0   | -1.5                                   | -3.1 | -2.1  | -4.4      | No                                  | No   | No   | No        | 0.0                    | 0.0     | No     |
| N,N-dimethylformamide | 120.0   | 1.4                                    | 2.7  | 0.6   | 3.2       | Yes                                 | Yes  | Yes  | Yes       | 0.2                    | 18.4    | Yes    |
| 2,3-dihydropyran      | 85.0    | 0.4                                    | 0.2  | 0.2   | 0.2       | Yes                                 | Yes  | Yes  | Yes       | 0.0                    | 0.7     | Yes    |
| methylacetate         | 55.8    | 0.9                                    | 1.6  | 0.3   | 1.8       | Yes                                 | Yes  | Yes  | Yes       | 0.0                    | 0.2     | Yes    |
| ethanol               | 77.2    | -0.5                                   | -0.4 | -1.5  | -1.2      | Yes                                 | Yes  | No   | Yes       | 0.0                    | 0.0     | No     |
| cyclohexanol          | 120.0   | -1.0                                   | -1.4 | -2.2  | -2.5      | Yes                                 | Yes  | No   | No        | 0.0                    | 0.3     | No     |
| 2-butanone            | 78.5    | 0.8                                    | 1.4  | 0.0   | 1.5       | Yes                                 | Yes  | Yes  | Yes       | 0.0                    | 1.4     | No     |
| water                 | 99.0    | -6.6                                   | -6.4 | -10.5 | -11.7     | No                                  | No   | No   | No        | 0.0                    | 0.0     | No     |
| benzene               | 79.0    | 0.6                                    | 0.2  | 1.5   | 0.4       | Yes                                 | Yes  | Yes  | Yes       | 0.0                    | 0.9     | Yes    |
| acetic acid           | 116.9   | -0.5                                   | -0.1 | -1.5  | -0.8      | Yes                                 | Yes  | No   | Yes       | 0.0                    | 0.1     | No     |
| o-xylene              | 120.0   | 0.2                                    | -0.5 | 0.7   | -0.6      | Yes                                 | Yes  | Yes  | Yes       | 0.0                    | 2.5     | No     |

**Table S3.** Summary of log *P* for all four BFRs studied in this work, their miscibility, and PE polymer solubilities in 32 common solvents. The log *P* and BFR miscibility calculations are performed at room temperature (25°C) with PE as the polymer phase. The remark column of “yes” indicates that the solvent satisfies all leaching criteria and “no” if it does not satisfy all criteria. For this analysis, a maximum RT solubility of 6 wt% is used as part of the leaching criteria to reflect the maximum predicted solubility value that was associated with high experimental extraction efficiency in Table 1 of the main text; this threshold is higher than the threshold for precipitation during STRAP to account for the preference for slight swelling during leaching without excessive polymer dissolution.

| Solvents              | Th (°C) | log <i>P</i> values in each solvent at (RT) |      |      |           | Miscibility in each solvent at (RT) |      |      |           | Polymer Solubility (%) |         | Remark |
|-----------------------|---------|---------------------------------------------|------|------|-----------|-------------------------------------|------|------|-----------|------------------------|---------|--------|
|                       |         | Tri-PBDE                                    | HBCD | DECA | TBBPA-dbp | Tri-PBDE                            | HBCD | DECA | TBBPA-dbp | RT (°C)                | Th (°C) |        |
| methanol              | 63.6    | 0.6                                         | 2.5  | -0.2 | 2.6       | Yes                                 | Yes  | No   | Yes       | 0.0                    | 0.1     | No     |
| dichloromethane       | 39.0    | 1.6                                         | 3.1  | 2.4  | 4.5       | Yes                                 | Yes  | Yes  | Yes       | 0.0                    | 0.1     | Yes    |
| ethylene glycol       | 120.0   | -0.5                                        | 1.3  | -2.1 | 0.7       | No                                  | Yes  | No   | No        | 0.0                    | 0.9     | No     |
| Acetone               | 55.0    | 2.3                                         | 4.6  | 1.8  | 6.0       | Yes                                 | Yes  | Yes  | Yes       | 0.0                    | 0.3     | Yes    |
| Isopropanol           | 81.3    | 0.5                                         | 1.8  | -0.3 | 2.0       | Yes                                 | Yes  | No   | Yes       | 0.0                    | 1.6     | No     |
| 1-propanol            | 96.2    | 0.5                                         | 1.8  | -0.3 | 2.0       | Yes                                 | Yes  | No   | Yes       | 0.0                    | 4.2     | No     |
| toluene               | 109.6   | 1.5                                         | 2.3  | 2.4  | 3.5       | Yes                                 | Yes  | Yes  | Yes       | 0.1                    | 22.6    | Yes    |
| chloroform            | 60.1    | 1.5                                         | 2.6  | 2.4  | 3.9       | Yes                                 | Yes  | Yes  | Yes       | 0.0                    | 0.6     | Yes    |
| tetrahydrofuran       | 64.0    | 2.1                                         | 4.2  | 1.5  | 5.5       | Yes                                 | Yes  | Yes  | Yes       | 0.1                    | 1.7     | Yes    |
| tetrahydropyran       | 87.0    | 1.7                                         | 3.4  | 1.1  | 4.5       | Yes                                 | Yes  | Yes  | Yes       | 0.1                    | 7.3     | Yes    |
| cyclohexane           | 79.7    | 0.1                                         | 0.1  | 0.0  | 0.1       | Yes                                 | No   | No   | No        | 0.1                    | 6.9     | No     |
| heptane               | 97.5    | 0.0                                         | -0.1 | -0.1 | -0.1      | Yes                                 | No   | No   | No        | 0.1                    | 15.3    | No     |
| triethylamine         | 88.0    | 1.2                                         | 3.2  | 0.6  | 3.9       | Yes                                 | Yes  | No   | Yes       | 0.1                    | 8.7     | No     |
| 1,2-propanediol       | 120.0   | -0.2                                        | 1.4  | -1.6 | 1.1       | No                                  | Yes  | No   | No        | 0.0                    | 3.2     | No     |
| dimethyl sulfoxide    | 120.0   | 2.5                                         | 5.3  | 1.5  | 6.7       | Yes                                 | Yes  | Yes  | Yes       | 0.0                    | 5.3     | Yes    |
| hexane                | 67.7    | 0.1                                         | 0.1  | 0.1  | 0.1       | Yes                                 | No   | No   | No        | 0.1                    | 3.1     | No     |
| acetylacetone         | 120.0   | 1.6                                         | 3.8  | 1.0  | 4.8       | Yes                                 | Yes  | Yes  | Yes       | 0.0                    | 8.2     | Yes    |
| tert-butanol          | 81.4    | 0.4                                         | 1.6  | -0.3 | 1.8       | Yes                                 | Yes  | No   | Yes       | 0.0                    | 2.1     | No     |
| ethyl acetate         | 76.1    | 1.9                                         | 3.9  | 1.6  | 5.1       | Yes                                 | Yes  | Yes  | Yes       | 0.0                    | 1.6     | Yes    |
| isopropylamine        | 30.7    | 1.5                                         | 3.6  | 0.5  | 4.6       | Yes                                 | Yes  | No   | Yes       | 0.1                    | 0.1     | No     |
| diphenyl ether        | 120.0   | 1.4                                         | 2.4  | 2.3  | 3.6       | Yes                                 | Yes  | Yes  | Yes       | 0.0                    | 18.5    | Yes    |
| dodecane              | 120.0   | -0.4                                        | -0.4 | -0.7 | -0.7      | No                                  | No   | No   | No        | 0.1                    | 32.5    | No     |
| N,N-dimethylformamide | 120.0   | 2.6                                         | 5.3  | 2.0  | 6.9       | Yes                                 | Yes  | Yes  | Yes       | 0.0                    | 16.2    | Yes    |
| 2,3-dihydropyran      | 85.0    | 1.5                                         | 2.8  | 1.7  | 3.9       | Yes                                 | Yes  | Yes  | Yes       | 0.1                    | 5.0     | Yes    |
| methylacetate         | 55.8    | 2.1                                         | 4.2  | 1.8  | 5.6       | Yes                                 | Yes  | Yes  | Yes       | 0.0                    | 0.3     | Yes    |
| ethanol               | 77.2    | 0.6                                         | 2.2  | -0.1 | 2.5       | Yes                                 | Yes  | No   | Yes       | 0.0                    | 0.9     | No     |
| cyclohexanol          | 120.0   | 0.2                                         | 1.2  | -0.7 | 1.2       | Yes                                 | Yes  | No   | No        | 0.0                    | 22.1    | No     |
| 2-butanone            | 78.5    | 1.9                                         | 4.0  | 1.5  | 5.3       | Yes                                 | Yes  | Yes  | Yes       | 0.0                    | 2.3     | Yes    |
| water                 | 99.0    | -5.4                                        | -3.8 | -9.1 | -8.0      | No                                  | No   | No   | No        | 0.0                    | 0.0     | No     |
| benzene               | 79.0    | 1.8                                         | 2.8  | 2.9  | 4.1       | Yes                                 | Yes  | Yes  | Yes       | 0.0                    | 3.1     | Yes    |
| acetic acid           | 116.9   | 0.6                                         | 2.6  | -0.1 | 2.9       | Yes                                 | Yes  | No   | Yes       | 0.0                    | 2.0     | No     |
| o-xylene              | 120.0   | 1.3                                         | 2.1  | 2.1  | 3.1       | Yes                                 | Yes  | Yes  | Yes       | 0.1                    | 37.8    | Yes    |

**Table S4.** Summary of  $\log P$  for all four BFRs studied in this work, their miscibility, and PP polymer solubilities in 32 common solvents. The  $\log P$  and BFR miscibility calculations are performed at room temperature (25°C) with PP as the polymer phase. The remark column of “yes” indicates that the solvent satisfies all leaching criteria and “no” if it does not satisfy all criteria. For this analysis, a maximum RT solubility of 6 wt% is used as part of the leaching criteria to reflect the maximum predicted solubility value that was associated with high experimental extraction efficiency in Table 1 of the main text; this threshold is higher than the threshold for precipitation during STRAP to account for the preference for slight swelling during leaching without excessive polymer dissolution.

| Solvents              | Th (°C) | log $P$ values in each solvent at (RT) |      |      |           | Miscibility in each solvent at (RT) |      |      |           | Polymer Solubility (%) |         | Remark |
|-----------------------|---------|----------------------------------------|------|------|-----------|-------------------------------------|------|------|-----------|------------------------|---------|--------|
|                       |         | Tri-PBDE                               | HBCD | DECA | TBBPA-dbp | Tri-PBDE                            | HBCD | DECA | TBBPA-dbp | RT (°C)                | Th (°C) |        |
| methanol              | 63.6    | 0.8                                    | 2.6  | 0.1  | 2.8       | Yes                                 | Yes  | No   | Yes       | 0.0                    | 0.1     | No     |
| dichloromethane       | 39.0    | 1.8                                    | 3.3  | 2.6  | 4.7       | Yes                                 | Yes  | Yes  | Yes       | 0.2                    | 0.5     | Yes    |
| ethylene glycol       | 120.0   | -0.3                                   | 1.5  | -1.9 | 1.0       | No                                  | Yes  | No   | No        | 0.0                    | 0.1     | No     |
| Acetone               | 55.0    | 2.4                                    | 4.8  | 2.0  | 6.3       | Yes                                 | Yes  | Yes  | Yes       | 0.3                    | 1.4     | Yes    |
| Isopropanol           | 81.3    | 0.6                                    | 2.0  | 0.0  | 2.2       | Yes                                 | Yes  | No   | Yes       | 0.1                    | 2.3     | No     |
| 1-propanol            | 96.2    | 0.6                                    | 1.9  | -0.1 | 2.2       | Yes                                 | Yes  | No   | Yes       | 0.1                    | 4.1     | No     |
| toluene               | 109.6   | 1.7                                    | 2.5  | 2.6  | 3.7       | Yes                                 | Yes  | Yes  | Yes       | 1.1                    | 30.9    | Yes    |
| chloroform            | 60.1    | 1.7                                    | 2.8  | 2.7  | 4.1       | Yes                                 | Yes  | Yes  | Yes       | 0.5                    | 3.1     | Yes    |
| tetrahydrofuran       | 64.0    | 2.3                                    | 4.3  | 1.8  | 5.7       | Yes                                 | Yes  | Yes  | Yes       | 2.0                    | 10.1    | Yes    |
| tetrahydropyran       | 87.0    | 1.9                                    | 3.6  | 1.3  | 4.7       | Yes                                 | Yes  | Yes  | Yes       | 2.0                    | 20.9    | Yes    |
| cyclohexane           | 79.7    | 0.3                                    | 0.3  | 0.3  | 0.4       | Yes                                 | No   | No   | No        | 4.0                    | 24.0    | No     |
| heptane               | 97.5    | 0.1                                    | 0.1  | 0.1  | 0.1       | Yes                                 | No   | No   | No        | 2.9                    | 29.3    | No     |
| triethylamine         | 88.0    | 1.4                                    | 3.3  | 0.8  | 4.2       | Yes                                 | Yes  | No   | Yes       | 2.8                    | 23.2    | No     |
| 1,2-propanediol       | 120.0   | 0.0                                    | 1.6  | -1.3 | 1.3       | No                                  | Yes  | No   | No        | 0.0                    | 0.6     | No     |
| dimethyl sulfoxide    | 120.0   | 2.6                                    | 5.4  | 1.7  | 7.0       | Yes                                 | Yes  | Yes  | Yes       | 0.0                    | 1.7     | Yes    |
| hexane                | 67.7    | 0.2                                    | 0.2  | 0.3  | 0.3       | Yes                                 | No   | No   | No        | 3.6                    | 16.2    | No     |
| acetylacetone         | 120.0   | 1.8                                    | 3.9  | 1.2  | 5.0       | Yes                                 | Yes  | Yes  | Yes       | 0.0                    | 3.0     | Yes    |
| tert-butanol          | 81.4    | 0.6                                    | 1.8  | -0.1 | 2.0       | Yes                                 | Yes  | No   | Yes       | 0.3                    | 3.8     | No     |
| ethyl acetate         | 76.1    | 2.1                                    | 4.0  | 1.8  | 5.3       | Yes                                 | Yes  | Yes  | Yes       | 0.4                    | 4.3     | Yes    |
| isopropylamine        | 30.7    | 1.7                                    | 3.8  | 0.7  | 4.8       | Yes                                 | Yes  | No   | Yes       | 0.8                    | 1.1     | No     |
| diphenyl ether        | 120.0   | 1.6                                    | 2.6  | 2.6  | 3.8       | Yes                                 | Yes  | Yes  | Yes       | 0.2                    | 13.0    | Yes    |
| dodecane              | 120.0   | -0.2                                   | -0.3 | -0.5 | -0.5      | No                                  | No   | No   | No        | 1.4                    | 31.1    | No     |
| N,N-dimethylformamide | 120.0   | 2.8                                    | 5.5  | 2.2  | 7.1       | Yes                                 | Yes  | Yes  | Yes       | 0.2                    | 9.0     | Yes    |
| 2,3-dihydropyran      | 85.0    | 1.7                                    | 3.0  | 1.9  | 4.1       | Yes                                 | Yes  | Yes  | Yes       | 1.0                    | 14.4    | Yes    |
| methylacetate         | 55.8    | 2.2                                    | 4.4  | 2.0  | 5.8       | Yes                                 | Yes  | Yes  | Yes       | 0.2                    | 1.0     | Yes    |
| ethanol               | 77.2    | 0.8                                    | 2.4  | 0.1  | 2.7       | Yes                                 | Yes  | No   | Yes       | 0.1                    | 1.0     | No     |
| cyclohexanol          | 120.0   | 0.4                                    | 1.4  | -0.5 | 1.4       | Yes                                 | Yes  | No   | No        | 0.2                    | 14.7    | No     |
| 2-butanone            | 78.5    | 2.1                                    | 4.2  | 1.7  | 5.5       | Yes                                 | Yes  | Yes  | Yes       | 0.5                    | 5.7     | Yes    |
| water                 | 99.0    | -5.3                                   | -3.6 | -8.9 | -7.7      | No                                  | No   | No   | No        | 0.0                    | 0.0     | No     |
| benzene               | 79.0    | 1.9                                    | 3.0  | 3.1  | 4.3       | Yes                                 | Yes  | Yes  | Yes       | 0.7                    | 9.6     | Yes    |
| acetic acid           | 116.9   | 0.8                                    | 2.7  | 0.1  | 3.1       | Yes                                 | Yes  | No   | Yes       | 0.0                    | 0.3     | No     |
| o-xylene              | 120.0   | 1.5                                    | 2.3  | 2.3  | 3.3       | Yes                                 | Yes  | Yes  | Yes       | 1.1                    | 37.2    | Yes    |

**Table S5.** Phthalates considered in this work and their applications in plastic products.<sup>5</sup>

| <b>ID</b> | <b>Phthalates</b>                   | <b>Usage</b>                                                                                                                                                                                                                                                                                 |
|-----------|-------------------------------------|----------------------------------------------------------------------------------------------------------------------------------------------------------------------------------------------------------------------------------------------------------------------------------------------|
| P1        | BBP<br>butyl benzyl phthalate       | Vinyl tiles, food conveyor belts,<br>artificial leather, automotive trim, traffic cones                                                                                                                                                                                                      |
| P2        | DBP<br>di-n-butyl phthalate         | PVC plastics, latex adhesives,<br>cosmetics (most common phthalate added to nail polish),<br>personal care products, cellulose plastics, solvent for dyes                                                                                                                                    |
| P3        | DEHP<br>di-(2-ethylhexyl) phthalate | Building products (wallpaper, wire and cable insulation),<br>car products (vinyl upholstery, car seats),<br>clothing (footwear, raincoats), food packaging,<br>children's products (toys, grip bumpers), medical devices,<br>most widely added phthalate to PVC to make products<br>flexible |
| P4        | DEP<br>diethyl phthalate            | Personal care products,<br>most common phthalate added to enhance fragrance,<br>cosmetics.                                                                                                                                                                                                   |
| P5        | DiDP<br>di-isodecyl phthalate       | PVC plastics, covering on wires and cables,<br>artificial leather, toys, carpet backing, pool liners                                                                                                                                                                                         |
| P6        | DiNP<br>di-isononyl phthalate       | Garden hoses, pool liners, flooring tiles, tarps,<br>toys (most common phthalate added as a softener in the<br>manufacture of toys and childcare products - bath toys,<br>drinking straws, and rubber ducks)                                                                                 |
| P7        | DnHP<br>di-n-hexyl phthalate        | Dipmolded products, tool handles, dish-washer baskets,<br>flooring, vinyl gloves, flea collars,<br>conveyor belts used in food processing                                                                                                                                                    |
| P8        | DnOP<br>di-n-octyl phthalate        | Garden hoses, pool liners, flooring tiles, tarps,<br>seam cements, bottle cap liners, conveyor belts                                                                                                                                                                                         |

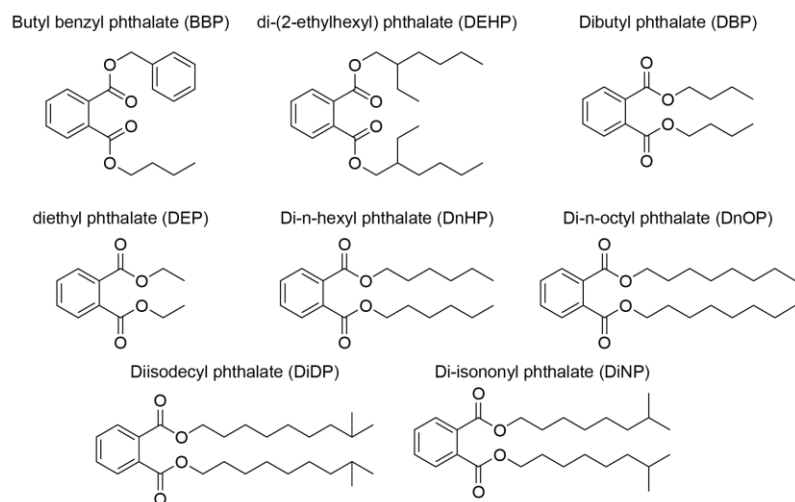

**Figure S1.** Chemical structures of the eight phthalates considered in this work.

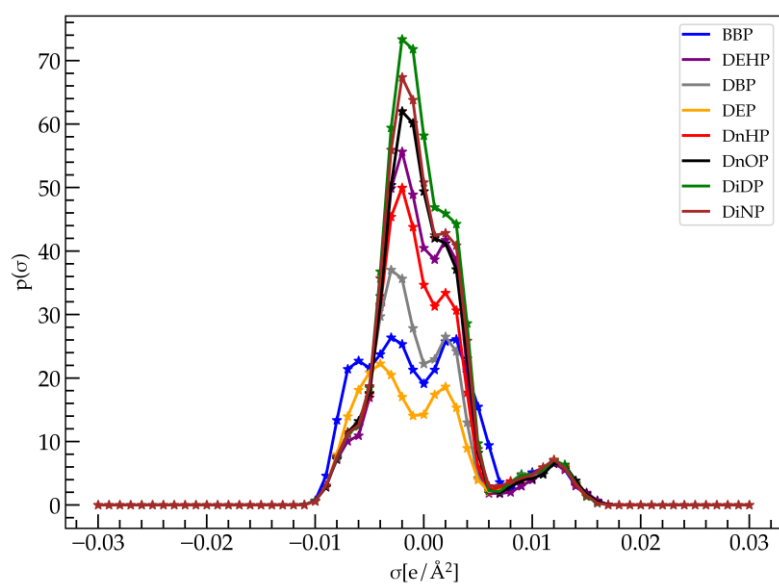

**Figure S2.**  $\sigma$ -profiles for the eight phthalates considered in this work. Abbreviations are reported in Figure S1.

**Table S6.** Summary of log *P* calculations for all eight phthalates in 32 common solvents. All calculations were performed at room temperature (25°C) with PVC as the polymer phase. Positive log *P* values (indicating partitioning into the solvent) are in green. The “all>0” reports if all eight phthalates have positive log *P* values in the given solvent, and “mean” reports the average log *P* value for that solvent across all eight phthalates.

| Solvent               | log <i>P</i> values for each phthalate in the selected solvent |       |       |       |       |       |       |       | all>0 | mean  |
|-----------------------|----------------------------------------------------------------|-------|-------|-------|-------|-------|-------|-------|-------|-------|
|                       | P1                                                             | P2    | P3    | P4    | P5    | P6    | P7    | P8    |       |       |
| methanol              | -0.50                                                          | -0.61 | -0.83 | -0.31 | -1.34 | -1.23 | -0.88 | -1.09 | no    | -0.88 |
| dichloromethane       | 1.64                                                           | 1.57  | 1.77  | 1.48  | 1.83  | 1.78  | 1.64  | 1.75  | yes   | 1.70  |
| ethylene glycol       | -1.33                                                          | -1.45 | -2.19 | -0.84 | -3.03 | -2.77 | -2.01 | -2.51 | no    | -2.12 |
| Acetone               | 1.09                                                           | 0.69  | 0.84  | 0.70  | 0.91  | 0.88  | 0.76  | 0.83  | yes   | 0.81  |
| Isopropanol           | -0.33                                                          | -0.24 | -0.10 | -0.26 | -0.21 | -0.22 | -0.24 | -0.19 | no    | -0.19 |
| 1-propanol            | -0.32                                                          | -0.24 | -0.11 | -0.24 | -0.23 | -0.24 | -0.25 | -0.20 | no    | -0.19 |
| toluene               | 0.44                                                           | 0.43  | 0.81  | 0.24  | 1.00  | 0.90  | 0.63  | 0.83  | yes   | 0.72  |
| chloroform            | 1.57                                                           | 1.67  | 2.08  | 1.45  | 2.20  | 2.10  | 1.82  | 2.08  | yes   | 1.94  |
| tetrahydrofuran       | 1.01                                                           | 0.83  | 1.30  | 0.60  | 1.64  | 1.50  | 1.11  | 1.38  | yes   | 1.21  |
| tetrahydropyran       | 0.65                                                           | 0.59  | 1.08  | 0.32  | 1.43  | 1.29  | 0.88  | 1.17  | yes   | 0.99  |
| cyclohexane           | -0.81                                                          | -0.39 | 0.27  | -0.82 | 0.65  | 0.47  | -0.02 | 0.34  | no    | 0.11  |
| heptane               | -1.01                                                          | -0.59 | 0.02  | -0.98 | 0.35  | 0.19  | -0.25 | 0.07  | no    | -0.14 |
| triethylamine         | -0.26                                                          | -0.06 | 0.51  | -0.40 | 0.86  | 0.70  | 0.26  | 0.58  | no    | 0.38  |
| 1,2-propanediol       | -0.88                                                          | -0.91 | -1.27 | -0.57 | -1.78 | -1.64 | -1.22 | -1.48 | no    | -1.27 |
| dimethyl sulfoxide    | 0.86                                                           | 0.31  | 0.21  | 0.52  | 0.03  | 0.07  | 0.21  | 0.12  | no    | 0.23  |
| hexane                | -0.93                                                          | -0.50 | 0.12  | -0.92 | 0.47  | 0.30  | -0.16 | 0.18  | no    | -0.04 |
| acetylacetone         | 0.45                                                           | 0.07  | -0.08 | 0.26  | -0.24 | -0.18 | -0.03 | -0.15 | no    | -0.05 |
| tert-butanol          | -0.30                                                          | -0.18 | 0.05  | -0.26 | 0.05  | 0.00  | -0.10 | 0.01  | no    | -0.04 |
| ethyl acetate         | 0.79                                                           | 0.54  | 0.76  | 0.47  | 0.88  | 0.82  | 0.66  | 0.77  | yes   | 0.71  |
| isopropylamine        | 0.60                                                           | 0.54  | 0.86  | 0.40  | 1.05  | 0.95  | 0.71  | 0.89  | yes   | 0.78  |
| diphenyl ether        | 0.26                                                           | 0.19  | 0.33  | 0.14  | 0.34  | 0.31  | 0.24  | 0.30  | yes   | 0.29  |
| dodecane              | -1.28                                                          | -0.84 | -0.31 | -1.20 | -0.01 | -0.16 | -0.54 | -0.25 | no    | -0.45 |
| N,N-dimethylformamide | 1.11                                                           | 0.63  | 0.71  | 0.69  | 0.76  | 0.73  | 0.67  | 0.71  | yes   | 0.71  |
| 2,3-dihydropyran      | 0.65                                                           | 0.59  | 0.97  | 0.39  | 1.20  | 1.09  | 0.80  | 1.01  | yes   | 0.88  |
| methylacetate         | 0.89                                                           | 0.54  | 0.65  | 0.57  | 0.67  | 0.65  | 0.58  | 0.62  | yes   | 0.62  |
| ethanol               | -0.27                                                          | -0.27 | -0.25 | -0.18 | -0.48 | -0.45 | -0.36 | -0.39 | no    | -0.32 |
| cyclohexanol          | -0.50                                                          | -0.31 | -0.08 | -0.41 | -0.07 | -0.12 | -0.23 | -0.11 | no    | -0.17 |
| 2-butanone            | 0.87                                                           | 0.60  | 0.83  | 0.53  | 0.98  | 0.91  | 0.73  | 0.85  | yes   | 0.79  |
| water                 | -5.54                                                          | -5.48 | -8.21 | -3.33 | -11.3 | -10.3 | -7.54 | -9.41 | no    | -8.02 |
| benzene               | 0.66                                                           | 0.57  | 0.87  | 0.44  | 0.99  | 0.92  | 0.71  | 0.86  | yes   | 0.80  |
| acetic acid           | -0.07                                                          | -0.33 | -0.77 | 0.12  | -1.49 | -1.31 | -0.77 | -1.06 | no    | -0.77 |
| o-xylene              | 0.28                                                           | 0.31  | 0.70  | 0.09  | 0.91  | 0.81  | 0.52  | 0.73  | yes   | 0.61  |

**Table S7.** List of all 26 PFAS and their groups based on structural features.

| <b>ID</b> | <b>PFAS Compound</b>                                                        | <b>CASRN</b> | <b>Group</b> |
|-----------|-----------------------------------------------------------------------------|--------------|--------------|
| 1         | Perfluorobutanoic acid (PFBA)                                               | 375-22-4     | 1            |
| 2         | Perfluoropentanoic acid (PFPA)                                              | 2706-90-3    | 1            |
| 3         | Perfluorohexanoic acid (PFHxA)                                              | 307-24-4     | 1            |
| 4         | Perfluoroheptanoic acid (PFHA)                                              | 375-85-9     | 1            |
| 5         | Perfluorooctanoic acid (PFOA)                                               | 335-67-1     | 1            |
| 6         | Perfluorononanoic acid (PFNA)                                               | 375-95-1     | 1            |
| 7         | Perfluorodecanoic acid (PFDA)                                               | 335-76-2     | 1            |
| 8         | 2,3,3,3-Tetrafluoro-2-(heptafluoropropoxy)propanoic acid (TFPA)             | 13252-13-6   | 1            |
| 9         | Perfluorotridecanoic acid (PFTriDA)                                         | 72629-94-8   | 1            |
| 10        | Perfluoroundecanoic acid (PFUnDA)                                           | 2058-94-8    | 1            |
| 11        | Perfluorododecanoic acid (PFDoDA)                                           | 307-55-1     | 1            |
| 12        | Perfluorotetradecanoic acid (PFTetraDA)                                     | 376-06-7     | 1            |
| 13        | Perfluorobutanesulfonic acid (PFBS)                                         | 375-73-5     | 2            |
| 14        | Perfluoropentanesulfonic acid (PFPS)                                        | 2706-91-4    | 2            |
| 15        | Perfluorohexanesulfonic acid (PFHxS)                                        | 355-46-4     | 2            |
| 16        | Perfluoroheptanesulfonic acid (PFHS)                                        | 375-92-8     | 2            |
| 17        | Perfluorooctanesulfonic acid (PFOS)                                         | 1763-23-1    | 2            |
| 18        | Perfluoroundecanesulfonic acid (PFUnDS)                                     | 749786-16-1  | 2            |
| 19        | Perfluorotridecanesulfonic acid (PFTriDS)                                   | 791563-89-8  | 2            |
| 20        | Perfluorodecanesulfonic acid (PFDS)                                         | 335-77-3     | 2            |
| 21        | Perfluorododecanesulfonic acid (PFDoDS)                                     | 79780-39-5   | 2            |
| 22        | Potassium 9-chlorohexadecafluoro-3-oxanonane-1-sulfonate (KCIHxDFS)         | 73606-19-6   | 2            |
| 23        | Perfluorononanesulfonate (PFNS)                                             | 474511-07-4  | 2            |
| 24        | Sodium dodecafluoro-3H-4, 8-dioxanonoate (NaDoDFNt)                         | 2250081-67-3 | 3            |
| 25        | Ammonium 2,3,3,3-tetrafluoro-2-(heptafluoropropoxy)propanoate (NH4TetraFPt) | 62037-80-3   | 3            |
| 26        | Ammonium 4,8-dioxa-3H-perfluorononanoate (NH4PFNt)                          | 958445-44-8  | 3            |

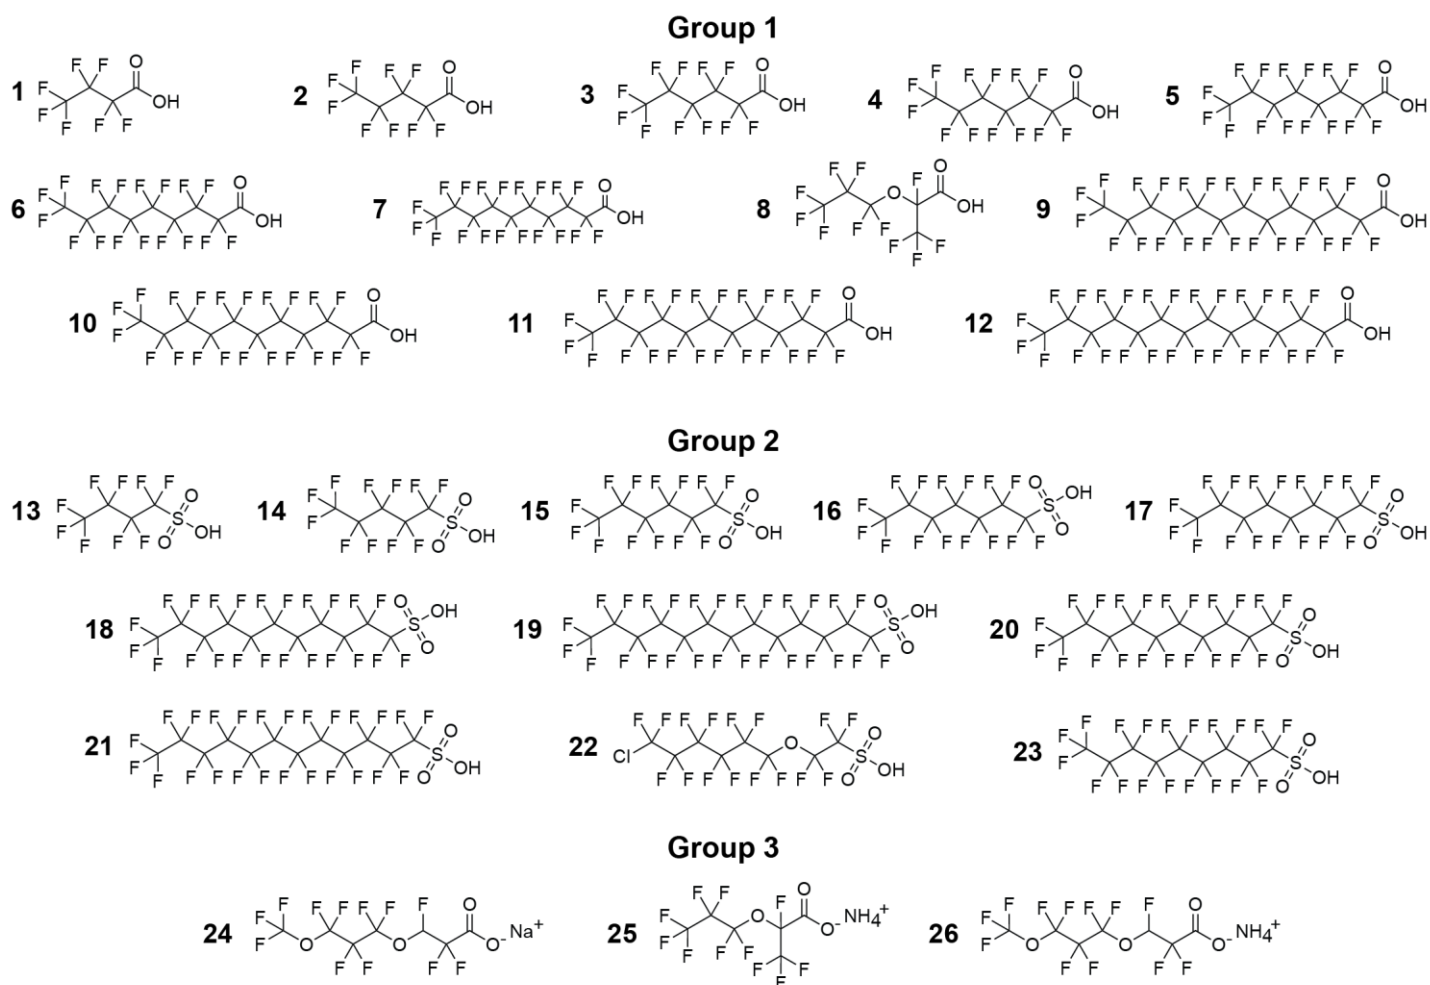

**Figure S3.** Chemical structures of all twenty-six (26) PFAS studied in this work and divided into four groups based on their chemical structures. Each structure is labeled with a number corresponding to an entry in Table S7.

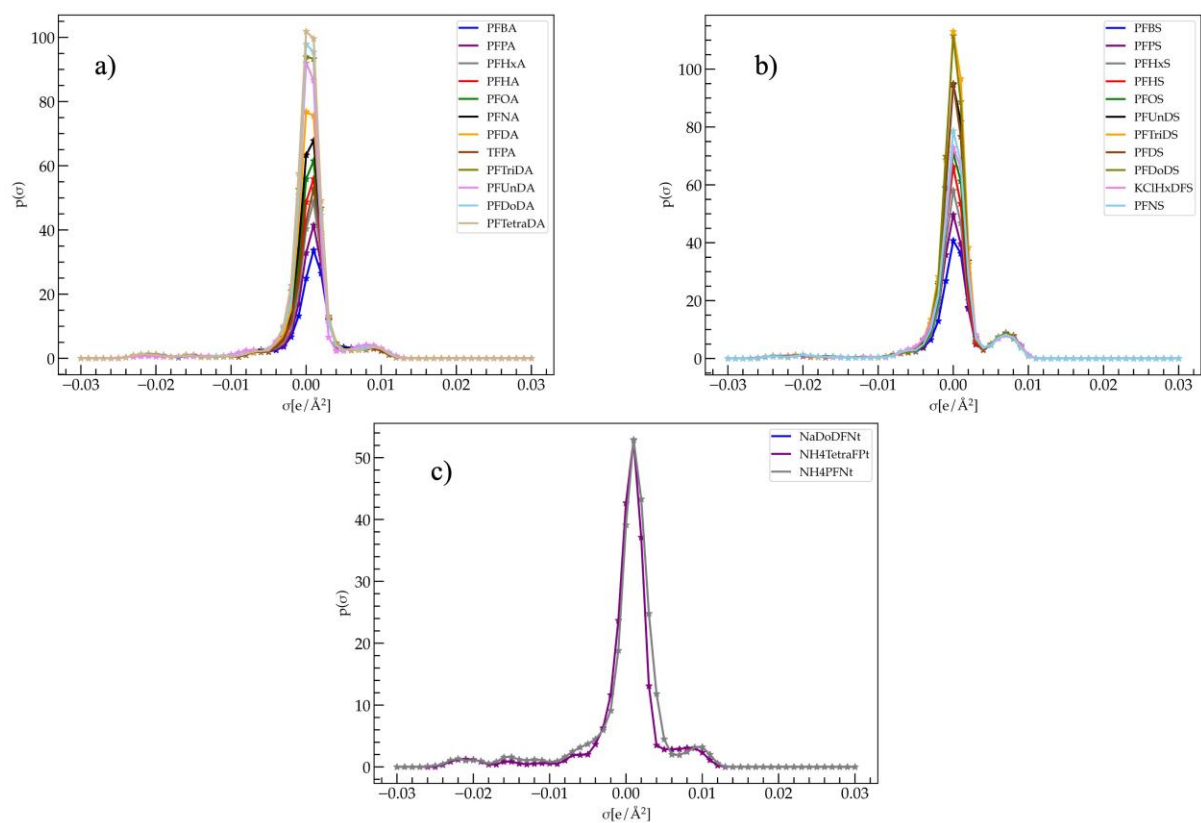

**Figure S4.**  $\sigma$ -profiles for all twenty-six PFAS studied in this work. PFAS are grouped based on their structures (shown in Figure S3). Similar structures lead to similar  $\sigma$ -profiles as expected.

## Effect of Dissolved Contaminants on Partitioning

Case Study 1 of the main text analyzed the partitioning of four BFRs and Case Study 2 experimentally validated the modeling framework through the extraction of BBP from PVC. In these and other case studies, the partitioning of each contaminant was considered independently, but partitioning behavior could change if mixtures of multiple contaminants were considered. We thus sought to analyze the impact of mixtures of contaminants. We assume that the selected solvent initially contains a known concentration of contaminant *A* and is subsequently used to extract a different contaminant *B* from a polymer matrix. Since xylenes were experimentally employed to extract BBP from PVC (**Figure 6** of the main text), we consider a scenario in which the resulting spent xylenes are reused to extract BFRs from PS, PET, PE, and PP polymers, which are commonly reported to contain such BFRs.<sup>3, 6</sup> Accordingly, we predict  $\log P$  values for tri-PBDE, DECA, HBCD, and TBBPA-dBP between a polymer phase and a solvent phase consisting of *o*-xylene with a known concentration of BBP. From **Figure 6**, at an elevated temperature of 130 °C, the experimental extraction efficiency of BBP from PVC using xylenes was approximately 100%, corresponding to complete removal of 0.3 g of BBP using 75 g of solvent based on the BBP–PVC blend mass ratio. Under these conditions, the resulting spent solvent would contain ~0.4 wt% BBP. In contrast, at room temperature, where only about 50% of the 0.3 g BBP was removed in a single wash, the spent xylene would contain ~0.2 wt% BBP. We thus compared  $\log P$  values computed for both conditions and compared to values computed without assuming any dissolved BBP, with results summarized in Tables S8 and S9.

**Table S8.** Predicted  $\log P$  values for BFRs in four different systems containing different polymers and spent *o*-xylene with a BBP concentration of 0.2 wt% at room temperature.

| Polymer | Tri-PBDE     |                | DECA         |                | HBCD         |                | TBBPA-dBP    |                |
|---------|--------------|----------------|--------------|----------------|--------------|----------------|--------------|----------------|
|         | 0 wt%<br>BBP | 0.2 wt%<br>BBP |
| PS      | 0.6          | 0.6            | 0.8          | 0.8            | 0.6          | 0.6            | 0.8          | 0.8            |
| PET     | 0.2          | 0.2            | 0.7          | 0.7            | -0.5         | -0.5           | -0.6         | -0.6           |
| PE      | 1.3          | 1.3            | 2.1          | 2.1            | 2.1          | 2.1            | 3.1          | 3.1            |
| PP      | 1.5          | 1.5            | 2.3          | 2.3            | 2.3          | 2.3            | 3.3          | 3.3            |

**Table S9.** Predicted  $\log P$  values for BFRs in four different systems containing different polymers and spent *o*-xylene with a BBP concentration of 0.4 wt% at 130°C. Values in bold indicate differences associated with the 0.4 wt% fraction.

| Polymer | Tri-PBDE     |                | DECA         |                | HBCD         |                | TBBPA-dBP    |                |
|---------|--------------|----------------|--------------|----------------|--------------|----------------|--------------|----------------|
|         | 0 wt%<br>BBP | 0.4 wt%<br>BBP |
| PS      | 0.6          | 0.6            | 0.8          | 0.8            | 0.6          | 0.6            | 0.8          | 0.8            |
| PET     | 0.4          | 0.4            | 0.7          | 0.7            | 0.0          | 0.0            | 0.1          | 0.1            |
| PE      | 0.9          | 0.9            | 1.5          | 1.5            | 1.4          | 1.4            | 2.1          | 2.1            |
| PP      | 1.1          | 1.1            | 1.7          | 1.7            | 1.6          | 1.6            | 2.3          | 2.3            |

The predicted  $\log P$  values in both Tables S8 and S9 indicate that, at a given temperature, the predicted partitioning of each BFR is not affected by the presence of dissolved BBP in the solvent phase. There are observed temperature-dependent variations in  $\log P$ , chiefly for BFR removal from PET, but these do not depend upon the BBP concentration. We also note that we chose BBP removal as a worst-case scenario because of the high amount of phthalate present in the PVC case study. In practical conditions, typical concentrations of BFRs and phthalates in polymer-solvent systems are on the order of ppm,<sup>7, 8</sup> which is substantially more dilute than the concentration considered here. Consequently, we believe it is unlikely that the presence of contaminants at typical dilute conditions will impact predicted partitioning behavior.

## References:

- (1) Zhou, P.; Sánchez-Rivera, K. L.; Huber, G. W.; Van Lehn, R. C. Computational approach for rapidly predicting temperature-dependent polymer solubilities using molecular-scale models. *ChemSusChem* **2021**, *14* (19), 4307–4316.
- (2) Zhou, P. Z.; Yu, J. L.; Sanchez-Rivera, K. L.; Huber, G. W.; Van Lehn, R. C. Large-scale computational polymer solubility predictions and applications to dissolution-based plastic recycling. *Green Chemistry* **2023**, *25* (11), 4402–4414.
- (3) Singla, M.; Díaz, J.; Broto-Puig, F.; Borrós, S. Sorption and release process of polybrominated diphenyl ethers (PBDEs) from different composition microplastics in aqueous medium: Solubility parameter approach. *Environmental pollution* **2020**, *262*, 114377.
- (4) mnim Altwaiq, A.; Wolf, M.; Van Eldik, R. Extraction of brominated flame retardants from polymeric waste material using different solvents and supercritical carbon dioxide. *Analytica Chimica Acta* **2003**, *491* (1), 111–123.
- (5) Wang, Y.; Qian, H. Phthalates and their impacts on human health. In *Healthcare*, 2021; Multidisciplinary Digital Publishing Institute: Vol. 9, p 603.
- (6) Wagner, S.; Strobl, L.; Bielmeier, T.; Schlummer, M. Scaling up dissolution-based recycling to eliminate brominated flame retardants from WEEE plastics. *Waste Manage* **2025**, *206*.
- (7) Liu, M.; Brandsma, S. H.; Schreder, E. From e-waste to living space: Flame retardants contaminating household items add to concern about plastic recycling. *Chemosphere* **2024**, *365*, 143319.
- (8) Pivnenko, K.; Eriksen, M. K.; Martín-Fernández, J. A.; Eriksson, E.; Astrup, T. F. Recycling of plastic waste: Presence of phthalates in plastics from households and industry. *Waste Manage* **2016**, *54*, 44–52.
