# Supplementary material
Source: Royal Society of Chemistry journal article supplement (doi:10.1039/d5gc06059a)
Supplement: d5gc06059a2.xlsx [file d5gc06059a2.xlsx]

## Sheet: PFAS_Miscibility
S/N	Solvents	Carboxylic Group												Sulfonic Group 2											Esters Group 3
		Perfluorobutanoic acid	Perfluoropentanoic acid	Perfluorohexanoic acid	Perfluoroheptanoic acid	Perfluorooctanoic Acid	Perfluorononanoic acid	Perfluorodecanoic acid	2,3,3,3-Tetrafluoro-2-(heptafluoropropoxy)propanoic acid	perfluorotridecanoic acid	perfluoroundecanoic acid	perfluorododecanoic acid	perfluorotetradecanoic acid	Perfluorobutanesulfonic acid	Perfluoropentanesulfonic acid	Perfluorohexanesulfonic acid	Perfluoroheptanesulfonic acid	Perfluorooctanesulfonic acid	perfluoroundecanesulfonic acid	perfluorotridecanesulfonic acid	perfluorodecanesulfonic acid	perfluorododecanesulfonic acid	Potassium 9-chlorohexadecafluoro-3-oxanonane-1-sulfonate	perfluorononanesulfonate	Sodium dodecafluoro-3H-4, 8-dioxanonanoate	Ammonium 2,3,3,3-tetrafluoro-2-(heptafluoropropoxy)propanoate	Ammonium 4,8-dioxa-3H-perfluorononanoate
1	methanol	Yes	Yes	Yes	Yes	Yes	Yes	Yes	Yes	Yes	Yes	Yes	Yes	Yes	Yes	Yes	Yes	Yes	Yes	Yes	Yes	Yes	Yes	Yes	Yes	Yes	Yes
2	dichloromethane	Yes	Yes	Yes	No	No	No	No	No	No	No	No	No	Yes	Yes	Yes	Yes	No	No	No	No	No	Yes	No	No	No	No
3	ethylene glycol	Yes	Yes	Yes	Yes	Yes	Yes	Yes	Yes	Yes	No	Yes	Yes	Yes	Yes	Yes	Yes	Yes	Yes	Yes	Yes	Yes	Yes	Yes	Yes	Yes	Yes
4	Acetone	Yes	Yes	Yes	Yes	Yes	Yes	Yes	Yes	Yes	Yes	Yes	Yes	Yes	Yes	Yes	Yes	Yes	Yes	Yes	Yes	Yes	Yes	Yes	Yes	Yes	Yes
5	Isopropanol	Yes	Yes	Yes	Yes	Yes	Yes	Yes	Yes	Yes	Yes	Yes	Yes	Yes	Yes	Yes	Yes	Yes	Yes	Yes	Yes	Yes	Yes	Yes	Yes	Yes	Yes
6	1-propanol	Yes	Yes	Yes	Yes	Yes	Yes	Yes	Yes	Yes	Yes	Yes	Yes	Yes	Yes	Yes	Yes	Yes	Yes	Yes	Yes	Yes	Yes	Yes	Yes	Yes	Yes
7	toluene	Yes	Yes	Yes	Yes	Yes	Yes	No	Yes	No	No	No	No	Yes	Yes	Yes	Yes	Yes	No	No	No	No	Yes	Yes	Yes	Yes	Yes
8	chloroform	Yes	Yes	No	No	No	No	No	No	No	No	No	No	Yes	Yes	Yes	No	No	No	No	No	No	Yes	No	No	No	No
9	tetrahydrofuran	Yes	Yes	Yes	Yes	Yes	Yes	Yes	Yes	Yes	Yes	Yes	Yes	Yes	Yes	Yes	Yes	Yes	Yes	Yes	Yes	Yes	Yes	Yes	Yes	Yes	Yes
10	tetrahydropyran	Yes	Yes	Yes	Yes	Yes	Yes	Yes	Yes	Yes	Yes	Yes	Yes	Yes	Yes	Yes	Yes	Yes	Yes	Yes	Yes	Yes	Yes	Yes	Yes	Yes	Yes
11	cyclohexane	Yes	No	No	No	No	No	No	No	No	No	No	No	Yes	Yes	No	No	No	No	No	No	No	Yes	No	No	No	No
12	heptane	No	No	No	No	No	No	No	No	No	No	No	No	No	No	No	No	No	No	No	No	No	No	No	No	No	No
13	triethylamine	Yes	Yes	Yes	Yes	Yes	Yes	Yes	Yes	Yes	Yes	Yes	Yes	Yes	Yes	Yes	Yes	Yes	Yes	Yes	Yes	Yes	Yes	Yes	Yes	Yes	Yes
14	1,2-propanediol	Yes	Yes	Yes	Yes	Yes	Yes	Yes	Yes	Yes	Yes	Yes	Yes	Yes	Yes	Yes	Yes	Yes	Yes	Yes	Yes	Yes	Yes	Yes	Yes	Yes	Yes
15	dimethyl sulfoxide	Yes	Yes	Yes	Yes	Yes	Yes	Yes	Yes	Yes	Yes	Yes	Yes	Yes	Yes	Yes	Yes	Yes	Yes	Yes	Yes	Yes	Yes	Yes	Yes	Yes	Yes
16	hexane	No	No	No	No	No	No	No	No	No	No	No	No	Yes	No	No	No	No	No	No	No	No	Yes	No	No	No	No
17	acetylacetone	Yes	Yes	Yes	Yes	Yes	Yes	Yes	Yes	Yes	Yes	Yes	Yes	Yes	Yes	Yes	Yes	Yes	Yes	Yes	Yes	Yes	Yes	Yes	Yes	Yes	Yes
18	tert-butanol	Yes	Yes	Yes	Yes	Yes	Yes	Yes	Yes	Yes	Yes	Yes	Yes	Yes	Yes	Yes	Yes	Yes	Yes	Yes	Yes	Yes	Yes	Yes	Yes	Yes	Yes
19	ethyl acetate	Yes	Yes	Yes	Yes	Yes	Yes	Yes	Yes	Yes	Yes	Yes	Yes	Yes	Yes	Yes	Yes	Yes	Yes	Yes	Yes	Yes	Yes	Yes	Yes	Yes	Yes
20	isopropylamine	Yes	Yes	Yes	Yes	Yes	Yes	Yes	Yes	Yes	Yes	Yes	Yes	Yes	Yes	Yes	Yes	Yes	Yes	Yes	Yes	Yes	Yes	Yes	Yes	Yes	Yes
21	diphenyl ether	Yes	Yes	Yes	No	No	No	No	Yes	No	No	No	No	Yes	Yes	Yes	Yes	No	No	No	No	No	Yes	No	Yes	Yes	Yes
22	dodecane	No	No	No	No	No	No	No	No	No	No	No	No	No	No	No	No	No	No	No	No	No	No	No	No	No	No
23	N,N-dimethylformamide	Yes	Yes	Yes	Yes	Yes	Yes	Yes	Yes	Yes	Yes	Yes	Yes	Yes	Yes	Yes	Yes	Yes	Yes	Yes	Yes	Yes	Yes	Yes	Yes	Yes	Yes
24	2,3-dihydropyran	Yes	Yes	Yes	Yes	Yes	Yes	Yes	Yes	Yes	Yes	Yes	Yes	Yes	Yes	Yes	Yes	Yes	Yes	Yes	Yes	Yes	Yes	Yes	Yes	Yes	Yes
25	methylacetate	Yes	Yes	Yes	Yes	Yes	Yes	Yes	Yes	Yes	Yes	Yes	Yes	Yes	Yes	Yes	Yes	Yes	Yes	Yes	Yes	Yes	Yes	Yes	Yes	Yes	Yes
26	ethanol	Yes	Yes	Yes	Yes	Yes	Yes	Yes	Yes	Yes	Yes	Yes	Yes	Yes	Yes	Yes	Yes	Yes	Yes	Yes	Yes	Yes	Yes	Yes	Yes	Yes	Yes
27	cyclohexanol	Yes	Yes	Yes	Yes	Yes	Yes	Yes	Yes	Yes	Yes	Yes	Yes	Yes	Yes	Yes	Yes	Yes	Yes	Yes	Yes	Yes	Yes	Yes	Yes	Yes	Yes
28	2-butanone	Yes	Yes	Yes	Yes	Yes	Yes	Yes	Yes	Yes	Yes	Yes	Yes	Yes	Yes	Yes	Yes	Yes	Yes	Yes	Yes	Yes	Yes	Yes	Yes	Yes	Yes
29	water	Yes	Yes	No	No	No	No	No	No	No	No	No	No	Yes	No	No	No	No	No	No	No	No	No	No	No	No	No
30	benzene	Yes	Yes	Yes	Yes	Yes	No	No	Yes	No	No	No	No	Yes	Yes	Yes	Yes	Yes	No	No	No	No	Yes	Yes	Yes	Yes	Yes
31	acetic acid	Yes	Yes	Yes	Yes	Yes	Yes	Yes	Yes	Yes	No	Yes	No	Yes	Yes	Yes	Yes	Yes	Yes	No	Yes	Yes	Yes	Yes	Yes	Yes	Yes
32	Xylene	Yes	Yes	Yes	Yes	Yes	No	No	Yes	No	No	No	No	Yes	Yes	Yes	Yes	Yes	No	No	No	No	Yes	Yes	Yes	Yes	Yes
	Yes means miscible with solvent

## Sheet: PFAS_log_D
S/N	Solvents	Carboxylic Group												Sulfonic Group 2											Fluoroethers Group 3
		Perfluorobutanoic acid	Perfluoropentanoic acid	Perfluorohexanoic acid	Perfluoroheptanoic acid	Perfluorooctanoic Acid	Perfluorononanoic acid	Perfluorodecanoic acid	2,3,3,3-Tetrafluoro-2-(heptafluoropropoxy)propanoic acid	perfluorotridecanoic acid	perfluoroundecanoic acid	perfluorododecanoic acid	perfluorotetradecanoic acid	Perfluorobutanesulfonic acid	Perfluoropentanesulfonic acid	Perfluorohexanesulfonic acid	Perfluoroheptanesulfonic acid	Perfluorooctanesulfonic acid	perfluoroundecanesulfonic acid	perfluorotridecanesulfonic acid	perfluorodecanesulfonic acid	perfluorododecanesulfonic acid	Potassium 9-chlorohexadecafluoro-3-oxanonane-1-sulfonate	perfluorononanesulfonate	Sodium dodecafluoro-3H-4, 8-dioxanonanoate	Ammonium 2,3,3,3-tetrafluoro-2-(heptafluoropropoxy)propanoate	Ammonium 4,8-dioxa-3H-perfluorononanoate
1	methanol	4.16737	4.09879	3.98954	3.8282	3.72181	3.59522	3.40738	3.76849	3.04463	1.74768	2.95049	2.90273	4.12117	3.95704	3.94872	3.60891	3.58944	3.16005	2.82799	3.29765	2.90833	3.36967	3.44713	4.8291	3.76849	4.8291
2	dichloromethane	0.813299	0.708413	0.629624	0.540222	0.46692	0.388418	0.30939	0.478484	0.0745007	0.230452	0.0971883	-0.00978951	0.801839	0.757528	0.690339	0.571452	0.4716	0.220384	0.0228402	0.316291	0.138148	0.563759	0.395664	0.812788	0.478484	0.812788
3	ethylene glycol	3.39489	3.2255	3.02331	2.7655	2.57321	2.3556	2.06575	2.73352	1.44289	0.426279	1.39948	1.20954	3.1754	2.91838	2.80803	2.37917	2.27456	1.56682	1.03707	1.76764	1.19886	1.97102	2.04404	3.70671	2.73352	3.70671
4	Acetone	4.40462	4.38977	4.34727	4.27055	4.21715	4.1585	4.10075	4.18676	3.89647	2.76018	3.85528	3.82486	4.47224	4.38548	4.44621	4.20219	4.21422	4.0118	3.84794	4.14255	3.90946	4.09761	4.14493	5.38372	4.18676	5.38372
5	Isopropanol	4.16478	4.15738	4.10773	4.02105	3.962	3.89645	3.80399	3.96041	3.59054	2.29004	3.52879	3.51179	4.21067	4.11897	4.16923	3.91706	3.92608	3.69536	3.51575	3.82006	3.56079	3.7504	3.84374	4.90531	3.96041	4.90531
6	1-propanol	4.06474	4.05404	4.0023	3.91343	3.85276	3.78565	3.69081	3.85464	3.47294	2.20927	3.41384	3.39254	4.10649	4.01489	4.06007	3.80965	3.81518	3.57898	3.3959	3.70282	3.44192	3.64061	3.73115	4.7857	3.85464	4.7857
7	toluene	0.859301	0.813743	0.783155	0.742566	0.70971	0.675925	0.647563	0.708791	0.540159	0.494577	0.560192	0.501728	0.862747	0.837574	0.825038	0.753518	0.719984	0.611926	0.525397	0.665764	0.577962	0.733084	0.686623	1.00241	0.708791	1.00241
8	chloroform	0.640944	0.576144	0.530523	0.48186	0.439404	0.394405	0.357779	0.424842	0.21864	0.361258	0.243019	0.171411	0.64066	0.629317	0.590587	0.523404	0.452066	0.310109	0.197159	0.37886	0.277552	0.564571	0.409548	0.653342	0.424842	0.653342
9	tetrahydrofuran	5.46837	5.53595	5.55618	5.5473	5.54691	5.54785	5.56308	5.44515	5.51727	3.95695	5.44542	5.50555	5.63301	5.59726	5.74432	5.53846	5.6154	5.59807	5.56911	5.70812	5.57687	5.50207	5.60148	6.74041	5.44515	6.74041
10	tetrahydropyran	4.96127	5.02819	5.05052	5.04651	5.04843	5.05328	5.07129	4.956	5.03792	3.59177	4.97456	5.0307	5.12142	5.0952	5.23325	5.05058	5.1206	5.11655	5.09997	5.21836	5.10363	5.01072	5.11075	6.09814	4.956	6.09814
11	cyclohexane	0.207571	0.228546	0.249005	0.270093	0.289907	0.310079	0.332807	0.261416	0.391982	0.354505	0.3761	0.412334	0.236807	0.256082	0.277226	0.29834	0.318562	0.380407	0.423031	0.362223	0.403727	0.335146	0.339097	0.284555	0.261416	0.284555
12	heptane	0.0745639	0.082423	0.0902009	0.0982218	0.105654	0.113277	0.122136	0.095117	0.14422	0.129181	0.138344	0.151943	0.0836547	0.090553	0.098791	0.106642	0.114616	0.138144	0.154281	0.131277	0.146812	0.119485	0.122444	0.104558	0.095117	0.104558
13	triethylamine	10.1905	10.3737	10.4241	10.4298	10.4442	10.4591	10.4714	10.279	10.4438	6.99421	10.2677	10.4419	10.5089	10.4393	10.7433	10.3597	10.5407	10.5514	10.541	10.7413	10.5131	10.2523	10.5187	12.2488	10.279	12.2488
14	1,2-propanediol	3.59631	3.49484	3.35834	3.17664	3.04094	2.8899	2.69211	3.13184	2.24296	1.16441	2.20174	2.07746	3.48288	3.30114	3.25696	2.91168	2.85051	2.35297	1.97885	2.5242	2.09365	2.60208	2.68536	4.0759	3.13184	4.0759
15	dimethyl sulfoxide	6.59551	6.61482	6.57562	6.49436	6.43819	6.37254	6.31284	6.38449	6.08298	4.22308	6.01175	6.00459	6.64287	6.51395	6.6346	6.29881	6.35926	6.13741	5.95595	6.30484	6.01153	6.17108	6.27966	8.07536	6.38449	8.07536
16	hexane	0.120451	0.133834	0.147101	0.160756	0.173588	0.186653	0.201369	0.155197	0.239629	0.216219	0.229577	0.252869	0.138989	0.151535	0.165173	0.178969	0.192105	0.232223	0.259835	0.220359	0.247274	0.203305	0.20542	0.169121	0.155197	0.169121
17	acetylacetone	3.25759	3.17627	3.07893	2.94766	2.84604	2.73658	2.61908	2.88748	2.27349	1.49709	2.26653	2.15123	3.22566	3.09675	3.08079	2.81201	2.76169	2.40399	2.13105	2.55934	2.23975	2.61356	2.64448	3.86981	2.88748	3.86981
18	tert-butanol	4.24321	4.25237	4.21807	4.14931	4.10218	4.05192	3.98268	4.08713	3.80587	2.47274	3.75097	3.74262	4.32225	4.24934	4.31643	4.08206	4.09908	3.91697	3.77485	4.0403	3.81007	3.93324	4.03099	5.0227	4.08713	5.0227
19	ethyl acetate	3.81501	3.81561	3.79199	3.74179	3.70551	3.66879	3.64209	3.6625	3.4946	2.51592	3.4636	3.44615	3.89006	3.83436	3.89946	3.70704	3.7206	3.58951	3.48096	3.70319	3.52745	3.61655	3.67423	4.67762	3.6625	4.67762
20	isopropylamine	8.45247	8.55173	8.56691	8.5374	8.52201	8.50552	8.48743	8.40428	8.38229	5.77404	8.26725	8.34927	8.70236	8.62936	8.8481	8.49852	8.60861	8.52585	8.44573	8.70822	8.45949	8.38291	8.56388	10.1661	8.40428	10.1661
21	diphenyl ether	0.83869	0.755347	0.685247	0.600538	0.530318	0.458189	0.385192	0.569632	0.160483	0.115396	0.198011	0.0817038	0.814414	0.75873	0.709681	0.585762	0.511437	0.279925	0.106454	0.374781	0.197369	0.48622	0.437149	0.897924	0.569632	0.897923
22	dodecane	-0.0842467	-0.091348	-0.0985271	-0.105862	-0.113068	-0.120253	-0.127557	-0.102175	-0.149267	-0.141202	-0.144073	-0.156543	-0.100918	-0.109403	-0.116026	-0.12422	-0.13021	-0.151884	-0.166997	-0.145489	-0.160817	-0.142479	-0.137325	-0.106091	-0.102175	-0.106091
23	N,N-dimethylformamide	5.46218	5.44938	5.39512	5.30138	5.23391	5.15875	5.08294	5.21186	4.8281	3.3477	4.78149	4.73954	5.52496	5.40737	5.48462	5.17919	5.20095	4.94679	4.74484	5.10827	4.81843	5.04531	5.11234	6.67306	5.21186	6.67306
24	2,3-dihydropyran	2.94959	2.95431	2.94678	2.9167	2.89731	2.87997	2.86946	2.85379	2.78446	2.03885	2.76715	2.75701	3.0612	3.0444	3.10093	2.96816	2.97367	2.90366	2.84355	2.99069	2.87345	2.91867	2.94659	3.57151	2.85379	3.57151
25	methylacetate	3.73563	3.71371	3.67087	3.59844	3.54632	3.49043	3.43887	3.5182	3.24162	2.32048	3.20948	3.17364	3.78635	3.7112	3.75518	3.54065	3.53935	3.34791	3.19368	3.46944	3.25607	3.42911	3.47505	4.55366	3.5182	4.55366
26	ethanol	4.24257	4.21662	4.14897	4.03953	3.96629	3.88227	3.76191	3.97584	3.50246	2.19829	3.42971	3.40449	4.26202	4.14828	4.18188	3.90112	3.90215	3.61095	3.38433	3.74034	3.44104	3.71471	3.80176	4.98481	3.97584	4.98481
27	cyclohexanol	3.99635	4.00292	3.96668	3.89736	3.84841	3.79703	3.72578	3.84417	3.5468	2.2702	3.49843	3.48267	4.06166	3.988	4.04831	3.82174	3.8346	3.65011	3.50808	3.77096	3.54318	3.66492	3.76554	4.70841	3.84417	4.70841
28	2-butanone	4.24004	4.23939	4.21009	4.15051	4.10792	4.06358	4.02405	4.07016	3.85639	2.73397	3.82001	3.79939	4.3225	4.2543	4.32471	4.10552	4.12184	3.96477	3.8361	4.08907	3.88745	4.01011	4.06601	5.1812	4.07016	5.1812
29	water	0.859337	0.365982	-0.160467	-0.801159	-1.26092	-1.79874	-2.59121	-0.770397	-4.02811	-4.63235	-4.1609	-4.592	-0.0303692	-0.636703	-1.11546	-1.9194	-2.23801	-3.98614	-5.28755	-3.71087	-4.95393	-2.88407	-2.79171	-0.126029	-0.770397	-0.126029
30	benzene	0.90276	0.839311	0.794013	0.736288	0.690726	0.642189	0.594873	0.697906	0.447681	0.428573	0.467719	0.393862	0.897175	0.859798	0.832541	0.74131	0.693926	0.538561	0.415818	0.602522	0.483618	0.709205	0.646202	1.02239	0.697906	1.02239
31	acetic acid	2.49843	2.37566	2.23671	2.0582	1.92502	1.7771	1.58764	2.00461	1.15059	0.534798	1.11382	0.988011	2.3139	2.14058	2.06476	1.76462	1.69017	1.2033	0.832852	1.34487	0.950656	1.48287	1.53445	2.82378	2.00461	2.82378
32	Xylene	0.798975	0.763311	0.740361	0.708824	0.682606	0.65658	0.637628	0.679316	0.5514	0.492003	0.571373	0.521118	0.805174	0.78594	0.780647	0.720291	0.694306	0.611133	0.543999	0.65887	0.587682	0.703938	0.668387	0.946682	0.679316	0.946682

## Sheet: Phthalates_Miscibility
lab name	Boiling point (°C)	T higher (°C)	P1		P2		P3		P4		P5		P6		P7		P8
			RT	T higher	RT	T higher	RT	T higher	RT	T higher	RT	T higher	RT	T higher	RT	T higher	RT	T higher
methanol	64.6	63.6	Yes	Yes	Yes	Yes	Yes	Yes	Yes	Yes	No	No	No	Yes	Yes	Yes	No	Yes
dichloromethane	40	39	Yes	Yes	Yes	Yes	Yes	Yes	Yes	Yes	Yes	Yes	Yes	Yes	Yes	Yes	Yes	Yes
ethylene glycol	197.3	120	No	Yes	No	Yes	No	No	Yes	Yes	No	No	No	No	No	No	No	No
Acetone	56	55	Yes	Yes	Yes	Yes	Yes	Yes	Yes	Yes	Yes	Yes	Yes	Yes	Yes	Yes	Yes	Yes
Isopropanol	82.3	81.3	Yes	Yes	Yes	Yes	Yes	Yes	Yes	Yes	Yes	Yes	Yes	Yes	Yes	Yes	Yes	Yes
1-propanol	97.2	96.2	Yes	Yes	Yes	Yes	Yes	Yes	Yes	Yes	Yes	Yes	Yes	Yes	Yes	Yes	Yes	Yes
toluene	110.6	109.6	Yes	Yes	Yes	Yes	Yes	Yes	Yes	Yes	Yes	Yes	Yes	Yes	Yes	Yes	Yes	Yes
chloroform	61.1	60.1	Yes	Yes	Yes	Yes	Yes	Yes	Yes	Yes	Yes	Yes	Yes	Yes	Yes	Yes	Yes	Yes
tetrahydrofuran	65	64	Yes	Yes	Yes	Yes	Yes	Yes	Yes	Yes	Yes	Yes	Yes	Yes	Yes	Yes	Yes	Yes
tetrahydropyran	88	87	Yes	Yes	Yes	Yes	Yes	Yes	Yes	Yes	Yes	Yes	Yes	Yes	Yes	Yes	Yes	Yes
cyclohexane	80.7	79.7	Yes	Yes	Yes	Yes	Yes	Yes	Yes	Yes	Yes	Yes	Yes	Yes	Yes	Yes	Yes	Yes
heptane	98.5	97.5	Yes	Yes	Yes	Yes	Yes	Yes	Yes	Yes	Yes	Yes	Yes	Yes	Yes	Yes	Yes	Yes
triethylamine	89	88	Yes	Yes	Yes	Yes	Yes	Yes	Yes	Yes	Yes	Yes	Yes	Yes	Yes	Yes	Yes	Yes
1,2-propanediol	187.6	120	Yes	Yes	Yes	Yes	No	Yes	Yes	Yes	No	Yes	No	Yes	No	Yes	No	Yes
dimethyl sulfoxide	189	120	Yes	Yes	Yes	Yes	Yes	Yes	Yes	Yes	Yes	Yes	Yes	Yes	Yes	Yes	Yes	Yes
hexane	68.7	67.7	Yes	Yes	Yes	Yes	Yes	Yes	Yes	Yes	Yes	Yes	Yes	Yes	Yes	Yes	Yes	Yes
acetylacetone	138	120	Yes	Yes	Yes	Yes	Yes	Yes	Yes	Yes	Yes	Yes	Yes	Yes	Yes	Yes	Yes	Yes
tert-butanol	82.4	81.4	Yes	Yes	Yes	Yes	Yes	Yes	Yes	Yes	Yes	Yes	Yes	Yes	Yes	Yes	Yes	Yes
ethyl acetate	77.1	76.1	Yes	Yes	Yes	Yes	Yes	Yes	Yes	Yes	Yes	Yes	Yes	Yes	Yes	Yes	Yes	Yes
isopropylamine	31.7	30.7	Yes	Yes	Yes	Yes	Yes	Yes	Yes	Yes	Yes	Yes	Yes	Yes	Yes	Yes	Yes	Yes
diphenyl ether	258	120	Yes	Yes	Yes	Yes	Yes	Yes	Yes	Yes	Yes	Yes	Yes	Yes	Yes	Yes	Yes	Yes
dodecane	216.3	120	Yes	Yes	Yes	Yes	Yes	Yes	Yes	Yes	Yes	Yes	Yes	Yes	Yes	Yes	Yes	Yes
N,N-dimethylformamide	153	120	Yes	Yes	Yes	Yes	Yes	Yes	Yes	Yes	Yes	Yes	Yes	Yes	Yes	Yes	Yes	Yes
2,3-dihydropyran	86	85	Yes	Yes	Yes	Yes	Yes	Yes	Yes	Yes	Yes	Yes	Yes	Yes	Yes	Yes	Yes	Yes
methylacetate	56.8	55.8	Yes	Yes	Yes	Yes	Yes	Yes	Yes	Yes	Yes	Yes	Yes	Yes	Yes	Yes	Yes	Yes
ethanol	78.2	77.2	Yes	Yes	Yes	Yes	Yes	Yes	Yes	Yes	Yes	Yes	Yes	Yes	Yes	Yes	Yes	Yes
cyclohexanol	160.8	120	Yes	Yes	Yes	Yes	Yes	Yes	Yes	Yes	Yes	Yes	Yes	Yes	Yes	Yes	Yes	Yes
2-butanone	79.5	78.5	Yes	Yes	Yes	Yes	Yes	Yes	Yes	Yes	Yes	Yes	Yes	Yes	Yes	Yes	Yes	Yes
water	100	99	No	No	No	No	No	No	No	No	No	No	No	No	No	No	No	No
benzene	80	79	Yes	Yes	Yes	Yes	Yes	Yes	Yes	Yes	Yes	Yes	Yes	Yes	Yes	Yes	Yes	Yes
acetic acid	117.9	116.9	Yes	Yes	Yes	Yes	Yes	Yes	Yes	Yes	No	Yes	No	Yes	Yes	Yes	No	Yes
o-xylene	144.5	120	Yes	Yes	Yes	Yes	Yes	Yes	Yes	Yes	Yes	Yes	Yes	Yes	Yes	Yes	Yes	Yes
Yes means miscible with solvent
